# Supplementary material for: Design Matters in Patient-Level Prediction: Evaluation of a Cohort vs. Case-Control Design When Developing Predictive Models in Observational Healthcare Datasets
Source: Research Square preprint supplement (doi:10.21203/rs.3.rs-341457/v1), 2021-03-23
Supplement: Supplementary file 1 [file c12f70f0901275680da20a0c.docx]

**Appendix**

Temporal change of data


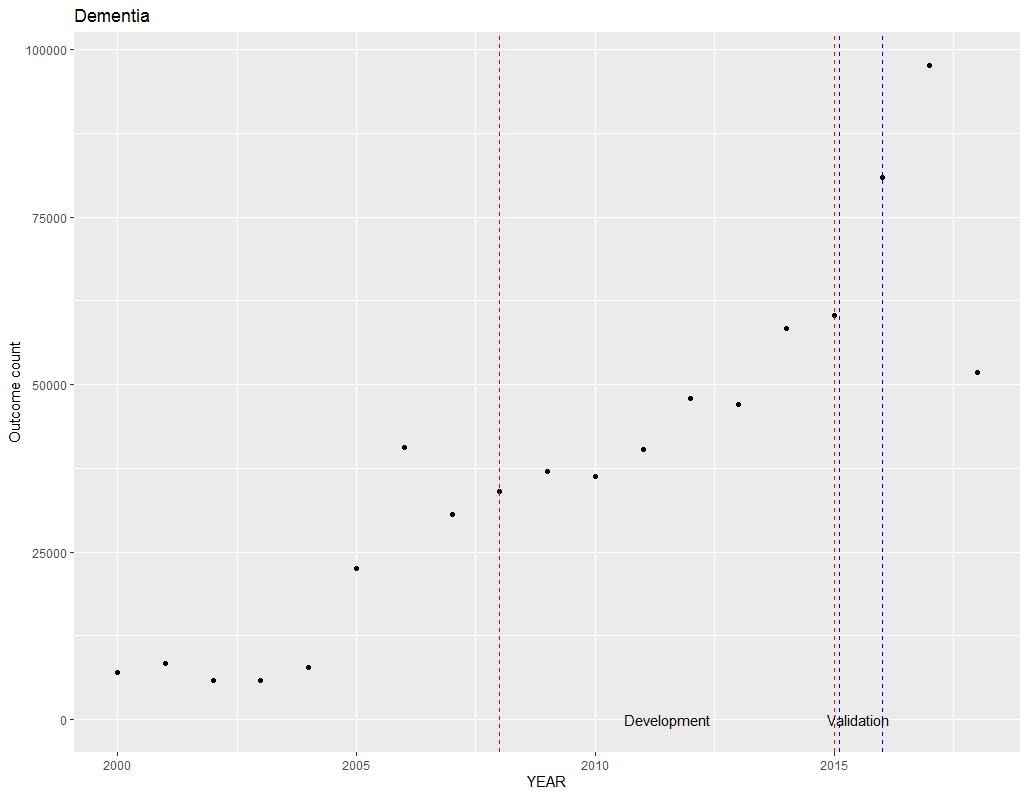


Figure 1 The outcome count per year (showing an increase during the years used to validate the models)


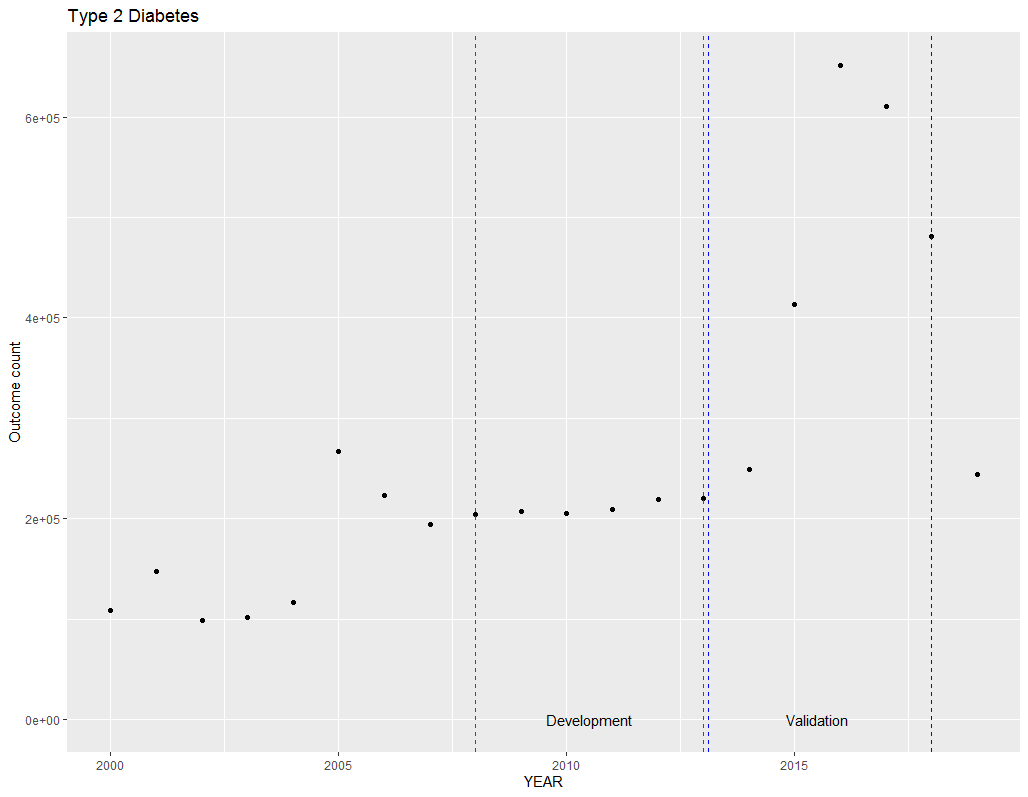


Figure 2 The outcome count per year (showing an increase during the years used to validate the models)
